# Supplementary material for: Alpha-blockers with or without phosphodiesterase type 5 inhibitor for treatment of lower urinary tract symptoms secondary to benign prostatic hyperplasia: a systematic review and meta-analysis
Source: Springer Nature journal article supplement (doi:10.1007/s00345-018-2370-z), 2018-06-12
Supplement: MOESM8 [file 15839206]

| **Table S2. 25-items CONSORT checklist** | | | | | | | | | | | | | | | | | | | | | | | | | | |
| --- | --- | --- | --- | --- | --- | --- | --- | --- | --- | --- | --- | --- | --- | --- | --- | --- | --- | --- | --- | --- | --- | --- | --- | --- | --- | --- |
| Study | 1 | 2 | 3 | 4 | 5 | 6 | 7 | 8 | 9 | 10 | 11 | 12 | 13 | 14 | 15 | 16 | 17 | 18 | 19 | 20 | 21 | 22 | 23 | 24 | 25 | Total score |
| Takeda, 2017 | √ | √ | √ | √ | √ | √ | √ | √ | × | √ | × | √ | √ | √ | √ | √ | √ | √ | √ | × | √ | √ | √ | √ | √ | 22 |
| Karami, 2016 | √ | √ | √ | √ | √ | √ | × | √ | × | √ | × | √ | √ | √ | √ | √ | √ | √ | √ | √ | √ | √ | × | √ | √ | 21 |
| Fawzi, 2016 | √ | √ | √ | √ | √ | √ | √ | √ | √ | √ | √ | √ | √ | √ | √ | √ | √ | √ | √ | √ | √ | √ | × | √ | √ | 24 |
| Kumar, 2013 | √ | √ | √ | √ | √ | √ | × | × | × | √ | × | √ | √ | √ | √ | √ | √ | √ | √ | √ | √ | √ | × | √ | √ | 20 |
| Regadas, 2012 | √ | √ | √ | √ | √ | √ | × | × | × | √ | × | √ | √ | √ | √ | √ | √ | √ | √ | √ | √ | √ | × | √ | √ | 20 |
| Abolyosr, 2012 | × | √ | √ | √ | √ | √ | × | × | × | √ | × | √ | √ | √ | √ | √ | √ | √ | × | × | √ | √ | × | √ | × | 16 |
| Gacci, 2012 | √ | √ | √ | √ | √ | √ | × | √ | √ | √ | √ | √ | √ | √ | √ | √ | √ | √ | √ | √ | √ | √ | × | √ | √ | 23 |
| Ozturk, 2012 | × | √ | √ | √ | √ | √ | × | √ | × | √ | × | √ | √ | √ | √ | √ | √ | √ | × | √ | √ | √ | × | √ | × | 18 |
| Tuncel, 2009 | × | √ | √ | √ | √ | √ | × | √ | × | √ | × | √ | √ | √ | √ | √ | √ | √ | × | × | √ | √ | × | √ | × | 17 |
| Bechara, 2008 | × | √ | √ | √ | √ | √ | × | √ | √ | √ | √ | √ | √ | √ | √ | √ | √ | √ | √ | √ | √ | √ | × | √ | × | 21 |
| Kaplan, 2007 | × | √ | √ | √ | √ | √ | × | √ | × | √ | × | √ | √ | √ | √ | √ | √ | √ | √ | √ | √ | √ | × | √ | √ | 20 |

1-25 indicate the specific items in CONSORT checklist. “√” : fulfill the item, “×”: not fulfill the item.
